# Supplementary material for: Spatial controls on groundwater response dynamics in a snowmelt-dominated montane catchment
Source: Copernicus journal article supplement (doi:10.5194/hess-18-1835-2014), 2014-05-21
Supplement: Supplementary file 1 [file hess-18-1835-2014-supplement.pdf]

Supplement of Hydrol. Earth Syst. Sci., 18, 1835–1856, 2014  
<http://www.hydrol-earth-syst-sci.net/hess-18-1835-2014/>  
doi:10.5194/hess-18-1835-2014-supplement  
© Author(s) 2014. CC Attribution 3.0 License.

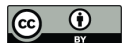

Hydrology and  
Earth System  
Sciences

Open Access

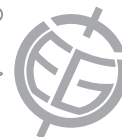

*Supplement of*

## **Spatial controls on groundwater response dynamics in a snowmelt-dominated montane catchment**

**R. S. Smith et al.**

*Correspondence to:* R. S. Smith ([rsmith@watersmith.ca](mailto:rsmith@watersmith.ca))

## **Supplementary Figures**

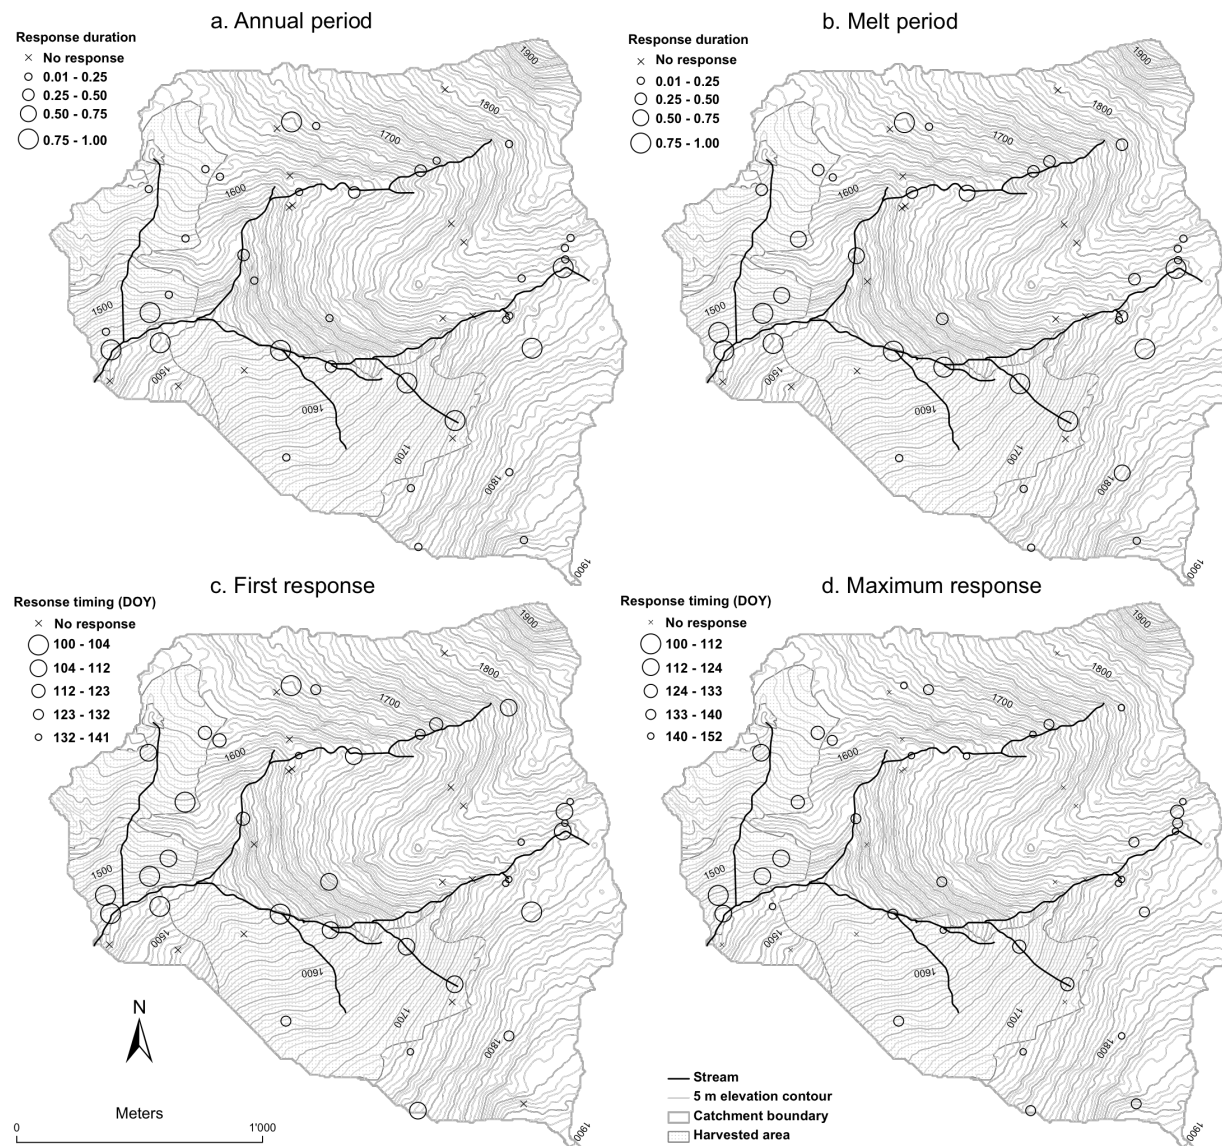

Figure S1. Maps of groundwater response duration (as a fractional portion of the total duration of the period) at the hillslope sites for the annual and melt periods (a) and groundwater response timing (day of the year, DOY) at the hillslope sites for the first and maximum responses (b). The timing of each period is indicated section 2.3.3.2 and Fig. 2.

a. Period 1 - fall transition

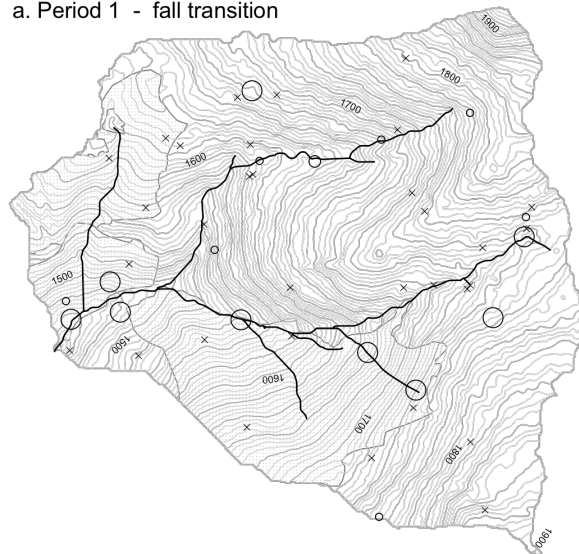

b. Period 2 - winter low flow

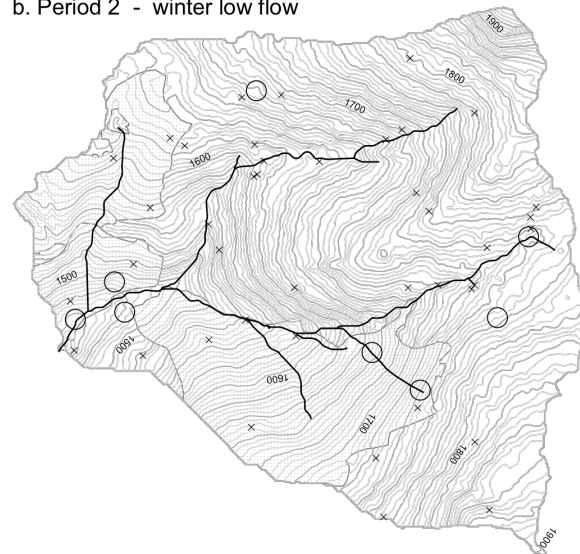

c. Period 3 - early-melt transition

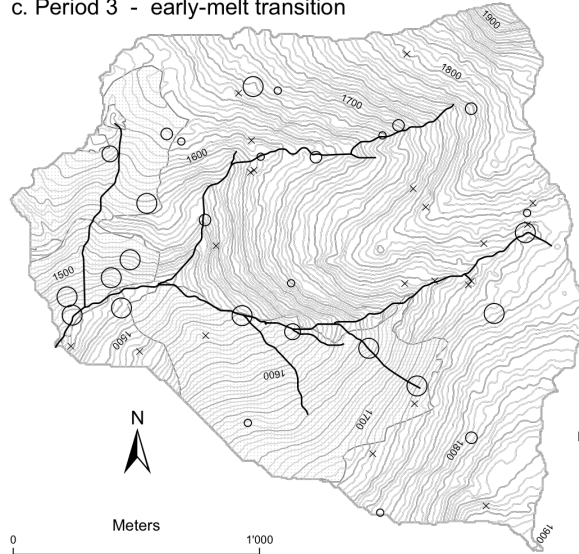

d. Period 4 - rising limb

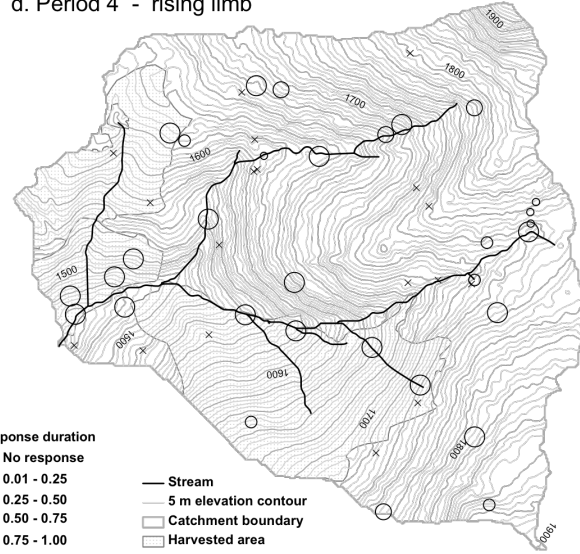

**Response duration**  
 x No response  
 o 0.01 - 0.25  
 o 0.25 - 0.50  
 o 0.50 - 0.75  
 o 0.75 - 1.00

— Stream  
 — 5 m elevation contour  
 — Catchment boundary  
 — Harvested area

a. Period 5 - peak flow

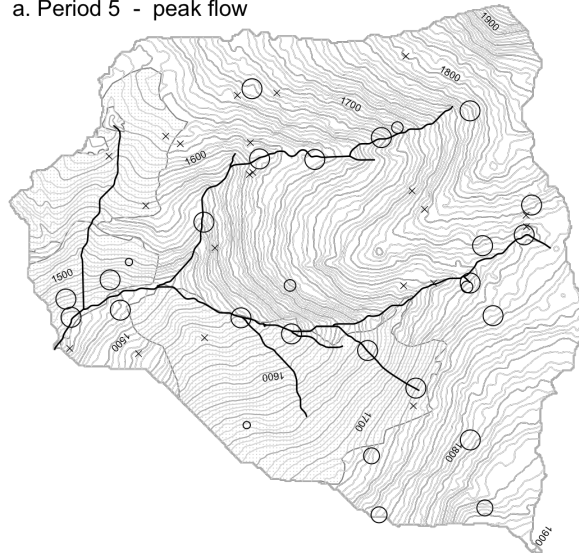

b. Period 6 - falling limb

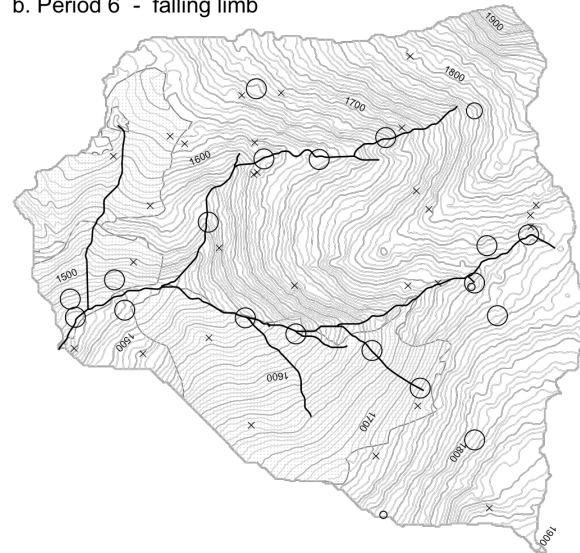

c. Period 7 - post-melt transition

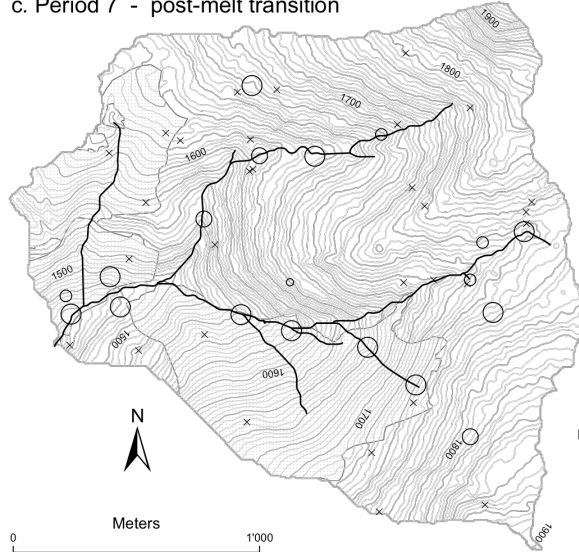

d. Period 8 - summer low flow

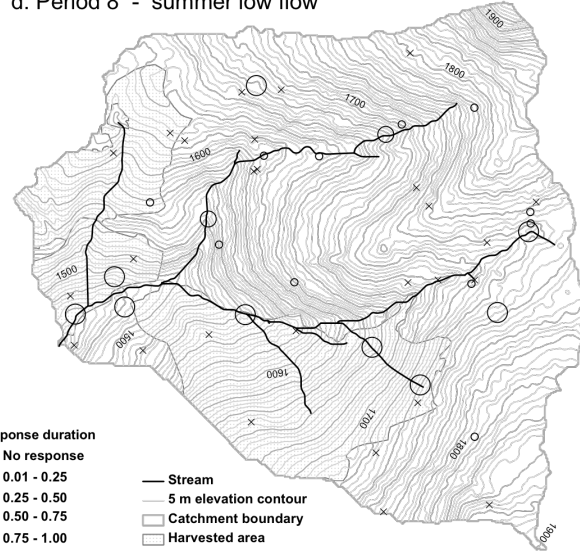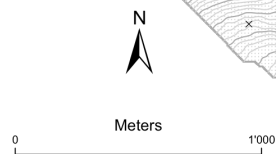

**Response duration**  
 x No response  
 ○ 0.01 - 0.25  
 ○ 0.25 - 0.50  
 ○ 0.50 - 0.75  
 ○ 0.75 - 1.00

— Stream  
 — 5 m elevation contour  
 □ Catchment boundary  
 □ Harvested area

Figure S2. Previous two pages. Maps of groundwater response duration (as a fractional portion of the total duration of the period) at the hillslope sites for periods 1 to 8. The timing of each period is indicated section 2.3.3.2 and Fig. 2.
